# Supplementary material for: Virulent and Avirulent Strains of Toxoplasma gondii Which Differ in Their Glycosylphosphatidylinositol Content Induce Similar Biological Functions in Macrophages
Source: PubMed Central journal article supplement (PMC3904843; doi:10.1371/journal.pone.0085386), 2014-01-28

Figure S2

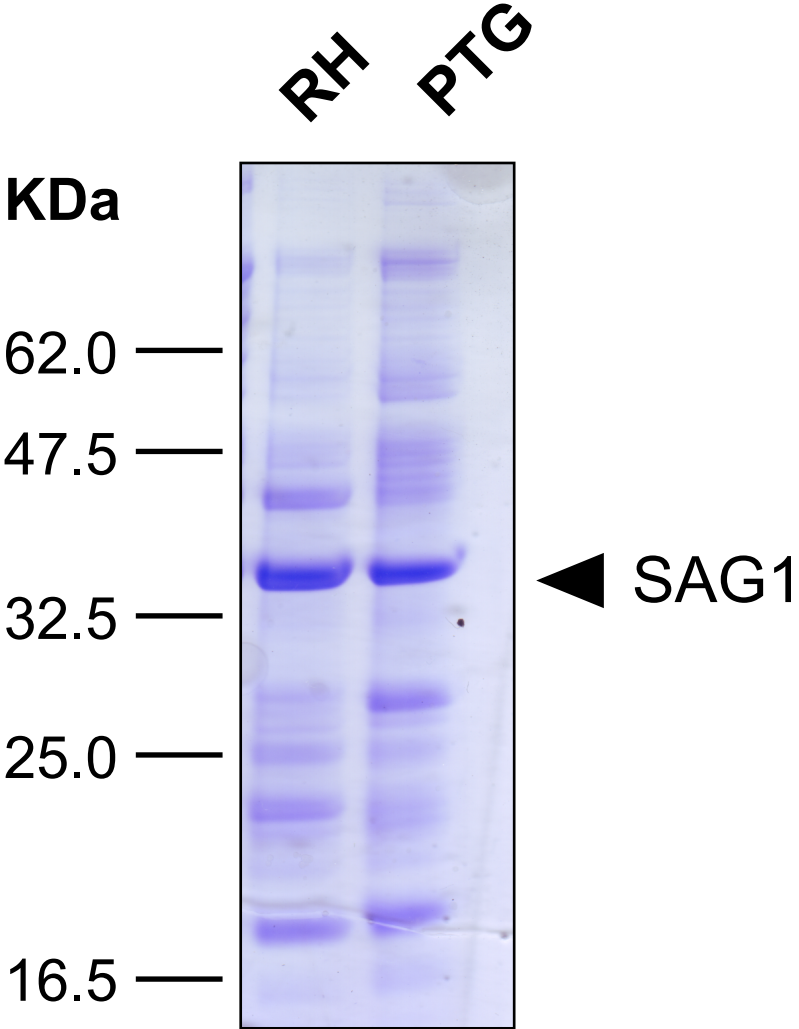

Supplement: pone.0085386.s002.pdf [file pone.0085386.s002.pdf]
