# Supplementary material for: Virulent and Avirulent Strains of Toxoplasma gondii Which Differ in Their Glycosylphosphatidylinositol Content Induce Similar Biological Functions in Macrophages
Source: PubMed Central journal article supplement (PMC3904843; doi:10.1371/journal.pone.0085386), 2014-01-28
Supplement: pone.0085386.s003.pdf [file pone.0085386.s003.pdf]

**Table S1**

| <b>Observed<br/><i>m/z</i><sup>ab</sup></b> | <b>Lipid<sup>c</sup></b> | <b>Principal<br/>component<sup>d</sup></b> | <b>Theoretical<br/><i>m/z</i><sup>e</sup></b> |
|---------------------------------------------|--------------------------|--------------------------------------------|-----------------------------------------------|
| 752.5                                       | 28:1                     | 14:0/14:1                                  | 752.45                                        |
| 754.6                                       | 28:0                     | 14:0/14:0                                  | 754.46                                        |
| 778.6                                       | 30:2                     | 14:1/16:1                                  | 778.46                                        |
| 780.3                                       | 30:1                     | 14:0/16:1                                  | 780.48                                        |
| 782.2                                       | 30:0                     | 14:0/16:0                                  | 782.49                                        |
| 804.5                                       | 32:3                     | 14:1/18:2                                  | 804.48                                        |
| 806.9                                       | 32:2                     | 14:1/18:1                                  | 806.49                                        |
| 808.3                                       | 32:1                     | 14:0/18:1                                  | 808.51                                        |
| <b>833.4</b>                                | <b>34:2</b>              | <b>16:1/18:1</b>                           | <b>833.52</b>                                 |
| <b>835.5</b>                                | <b>34:1</b>              | <b>16:0/18:1</b>                           | <b>835.53</b>                                 |
| 837.5                                       | 34:0                     | 16:0/18:0                                  | 837.55                                        |
| 859.5                                       | 36:3                     | 18:2/18:1                                  | 859.53                                        |
| <b>861.5</b>                                | <b>36:2</b>              | <b>18:1/18:1</b>                           | <b>861.55</b>                                 |
| <b>863.5</b>                                | <b>36:1</b>              | <b>18:0/18:1</b>                           | <b>863.57</b>                                 |
| 883.4                                       | 38:5                     | 18:1/18:1                                  | 883.53                                        |
| 885.5                                       | 38:4                     | 18:0/18:1                                  | 885.55                                        |
| <b>887.3</b>                                | <b>38:3</b>              | <b>18:1/18:1</b>                           | <b>887.57</b>                                 |
| <b>889.7</b>                                | <b>38:2</b>              | <b>20:1/18:1</b>                           | <b>889.58</b>                                 |
| 917.6                                       | 40:2                     | 22:0/18:2                                  | 917.61                                        |
| 919.6                                       | 40:1                     | 22:0/18:1                                  | 919.63                                        |
