# Supplementary material for: Virulent and Avirulent Strains of Toxoplasma gondii Which Differ in Their Glycosylphosphatidylinositol Content Induce Similar Biological Functions in Macrophages
Source: PubMed Central journal article supplement (PMC3904843; doi:10.1371/journal.pone.0085386), 2014-01-28
Supplement: pone.0085386.s004.pdf [file pone.0085386.s004.pdf]

**Table S2**

| Strain     | Accession     | Definition                                    | Mass         | Score      | Queries   |
|------------|---------------|-----------------------------------------------|--------------|------------|-----------|
| <b>RH</b>  | O60955        | 14-3-3 protein homologue                      | 30679        | 412        | 40        |
|            | P13404        | Dense granule protein 2 (GRA2) precursor      | 19830        | 96         | 17        |
|            | O00933        | Dense granule protein 7 (GRA7) precursor      | 25842        | 152        | 10        |
|            | Q9GRG4        | MIC3 microneme protein precursor              | 37859        | 96         | 4         |
|            | Q9GSV5        | MIC10 microneme protein precursor             | 23109        | 151        | 7         |
|            | Q8IT73        | MIC11 microneme protein precursor             | 22403        | 149        | 12        |
|            | Q95UJ7        | MLC1 myosin light chain                       | 24108        | 103        | 4         |
|            | <b>O15694</b> | <b>SAG1-related sequence 3</b>                | <b>36215</b> | <b>94</b>  | <b>1</b>  |
|            | <b>Q7KNK3</b> | <b>Surface antigen P30</b>                    | <b>26617</b> | <b>162</b> | <b>7</b>  |
|            | <b>Q9NBH0</b> | <b>Surface antigen P22</b>                    | <b>19094</b> | <b>160</b> | <b>5</b>  |
|            | Q9NJS3        | Tachyzoite serine proteinase inhibitor        | 32569        | 111        | 5         |
| <b>PTG</b> | O60955        | 14-3-3 protein homologue                      | 30679        | 218        | 34        |
|            | O77470        | Acyl carrier protein precursor                | 19368        | 93         | 2         |
|            | <b>O15681</b> | <b>Apical membrane antigen 1 homolog</b>      | <b>59940</b> | <b>82</b>  | <b>5</b>  |
|            | P13403        | Dense granule protein 1 (GRA1, p24) precursor | 20137        | 63         | 8         |
|            | P13404        | Dense granule protein 2 (GRA2) precursor      | 19830        | 177        | 27        |
|            | P13404        | <b>Dense granule protein 2 (GRA2)</b>         | <b>28018</b> | <b>164</b> | <b>26</b> |
|            | Q07828        | Dense granule protein 5 (GRA5)                | 12969        | 99         | 9         |
|            | Q27003        | Dense granule protein 6 (GRA6, p32, p33)      | 24015        | 87         | 3         |
|            | O00933        | Dense granule protein 7 (GRA7) precursor      | 25347        | 232        | 11        |
|            | Q9BPL7        | Enolase 2 (2-phosphoglycerate dehydratase 2)  | 48259        | 73         | 4         |
|            | Q7Z289        | Gliding-associated protein 45                 | 27301        | 71         | 5         |
|            | Q9BKE2        | Glyceraldehyde-3-phosphate dehydrogenase      | 36605        | 97         | 5         |
|            | P90611        | H4 protein                                    | 25968        | 95         | 2         |
|            | O00834        | MIC1 microneme protein                        | 48642        | 80         | 1         |
|            | Q9GRG4        | MIC3 microneme protein precursor              | 37859        | 111        | 5         |
|            | Q9GSV5        | MIC10 microneme protein precursor             | 23109        | 187        | 18        |
|            | Q8IT73        | MIC11 microneme protein precursor             | 22403        | 109        | 15        |
|            | Q95UJ7        | Myosin light chain TgMLC1                     | 24108        | 132        | 7         |
|            | Q9XZD5        | Peroxisomal catalase                          | 57234        | 94         | 11        |
|            | Q9XZD5        | Peroxisomal catalase                          | 57234        | 92         | 10        |
|            | Q8MPF4        | Putative PDI-like protein                     | 24894        | 64         | 3         |
|            | <b>O15694</b> | <b>SAG1-related sequence 3</b>                | <b>36215</b> | <b>100</b> | <b>2</b>  |
|            | Q95UQ2        | Subtilisin-like protein                       | 85034        | 117        | 15        |
|            | <b>Q9NBH1</b> | <b>Surface antigen P22</b>                    | <b>19010</b> | <b>133</b> | <b>4</b>  |
|            | <b>Q6DNI7</b> | <b>Surface antigen P30</b>                    | <b>34806</b> | <b>183</b> | <b>5</b>  |
|            | Q9NG25        | Toxofilin                                     | 27115        | 133        | 7         |
